# Supplementary material for: Preparation and Characterization of Soluble Dietary Fiber Edible Packaging Films Reinforced by Nanocellulose from Navel Orange Peel Pomace
Source: MDPI journal article supplement (doi:10.3390/polym16030315), 2024-01-24
Supplement: s1 [file s1]

# Supporting Information

## **Preparation and characterization of soluble dietary fiber edible packaging films reinforced by nanocellulose from navel orange peel pomace**

Lili Chen, Yincui Wu, Yuntian Guo, Xiaofeng Yan, Wenliang Liu \*, Si Huang \*

## 1. Supporting Experimental Section

The samples' crystallinity index (CrI) was calculate from Segal's empirical formula according to the following equation:

$$\text{CrI} = \frac{I_{002} - I_{am}}{I_{002}} \times 100\% \quad (\text{S1})$$

Where,  $I_{002}$  represented the intensity of the diffraction peak at  $22.6^\circ$  and  $I_{am}$  represented the diffraction intensity of the peak in the amorphous region at  $18^\circ$ .

The apparent shear viscosity and differential shear viscosity of film solutions was evaluated according to the following equation:

$$\eta_a(\dot{\gamma}) = \frac{\sigma}{\dot{\gamma}} \quad (\text{S2})$$

$$\eta(\dot{\gamma}) = \frac{d\sigma}{d\dot{\gamma}} \quad (\text{S3})$$

where  $\sigma$  was the shear stress (Pa),  $\dot{\gamma}$  was the shear rate ( $\text{s}^{-1}$ ),  $\eta_a(\dot{\gamma})$  was the apparent shear viscosity (Pa·s),  $\eta(\dot{\gamma})$  was the differential shear viscosity (Pa·s).

## 2. Supporting Figures

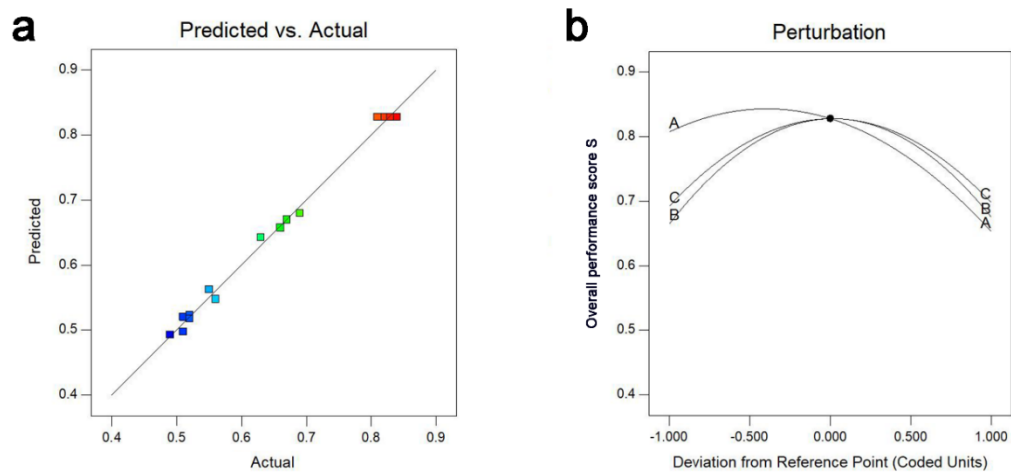

**Figure S1.** (a) Map of the model residual distribution for the overall performance score; (b) Factor fluctuation effect diagram of overall performance score.

### 3. Supporting Tables

Table S1 Principal component analysis experimental data of edible packaging film  
based on dietary fiber from navel orange peel pomace

| NO. | TS/(MPa) | EB/(%) | OR/(cc·m <sup>-2</sup> ·24 h <sup>-1</sup> ) | LR/(%) | HP/(N/15 mm) |
|-----|----------|--------|----------------------------------------------|--------|--------------|
| 1   | 6.73     | 89.10  | 0.96                                         | 67.97  | 3.58         |
| 2   | 11.02    | 128.42 | 0.87                                         | 81.17  | 3.07         |
| 3   | 6.90     | 106.68 | 1.34                                         | 74.60  | 4.64         |
| 4   | 8.49     | 93.52  | 1.19                                         | 73.90  | 3.96         |
| 5   | 11.34    | 59.46  | 1.09                                         | 77.20  | 3.18         |
| 6   | 6.72     | 105.38 | 1.85                                         | 75.90  | 4.79         |

Table S2 Correlation matrix of performance evaluation parameters of edible packaging film  
based on dietary fiber from navel orange peel pomace

| NO. | TS     | EB     | OR     | LR     | HP     |
|-----|--------|--------|--------|--------|--------|
| TS  | 1.000  | -0.177 | -0.554 | 0.710  | -0.807 |
| EB  | -0.177 | 1.000  | 0.062  | 0.349  | 0.214  |
| OR  | -0.554 | 0.062  | 1.000  | -0.008 | 0.870  |
| LR  | 0.710  | 0.349  | -0.008 | 1.000  | -0.253 |
| HP  | -0.807 | 0.214  | 0.870  | -0.253 | 1.000  |

Table S3 Component loading matrix of principal component analysis of edible packaging film  
based on dietary fiber from navel orange peel pomace

| Component | TS/<br>(MPa) | EB/<br>(%) | OR/<br>(cc·m <sup>-2</sup> ·24 h <sup>-1</sup> ) | LR/<br>(%) | HP/<br>(N/15 mm) |
|-----------|--------------|------------|--------------------------------------------------|------------|------------------|
| 1         | 0.949        | -0.938     | 0.800                                            | -0.508     | 0.142            |
| 2         | 0.225        | 0.183      | 0.323                                            | 0.806      | 0.761            |

Table S4 Weight value of performance indexes of edible packaging film based on dietary fiber from navel orange peel pomace

| Performance  | TS/<br>(MPa) | EB/<br>(%) | OR/<br>(cc·m <sup>-2</sup> ·24 h <sup>-1</sup> ) | LR/<br>(%) | HP/<br>(N/15 mm) |
|--------------|--------------|------------|--------------------------------------------------|------------|------------------|
| Weight value | 0.307        | 0.195      | 0.286                                            | 0.021      | 0.195            |

The weight calculation could be divided into the following three steps: Calculating each index's coefficients in the linear combination of the two principal components was the first step. The load coefficient divided by the characteristic root's square root was the calculation's formula; The second step was to calculate the coefficients for each index in the comprehensive scoring model. The formula for calculation was to multiply the linear combination coefficients by the variance contribution rate, added them together, and then divided them by the total variance contribution rate; The third step was to normalize the coefficients of each index in the comprehensive score model and then obtained their weight values.

Table S5 Overall performance score model fitting analysis

|           |       |                |        |
|-----------|-------|----------------|--------|
| Std. Dev. | 0.015 | R-Squared      | 0.9948 |
| Mean      | 0.65  | Adj R-Squared  | 0.9881 |
| C.V. %    | 2.29  | Pred R-Squared | 0.9503 |
| PRESS     | 0.015 | Adeq Precision | 29.588 |

Table S6 Multiple factors combining at S maximum

| OSDF | ONCC | Gly | Overall performance score |
|------|------|-----|---------------------------|
| 0.17 | 4    | 25  | 0.843                     |
